Title: CEREBROVASCULAR RESPONSIVENESS TO PaO<sub>2</sub> IS PRESERVED DURING HYPOTHERMIC CARDIOPULMONARY BYPASS

Authors: A. T. Rogers, M.B., Ch.B., D. A. Stump, Ph.D., D. S. Prough, M.D., K. C. Angert, M.D., S. A. Wallenhaupt, M. D.

Affiliation: Departments of Anesthesia, Neurology, and Surgery, (Section on Cardiothoracic Surgery), Wake Forest University Medical Center, Winston-Salem, North Carolina, 27103

#### Introduction:

In awake volunteers, cerebral blood flow (CBF) changes in response to alterations in arterial oxygen tension (PaO<sub>2</sub>)<sup>1,2</sup>. We report CBF changes induced by specifically varying PaO<sub>2</sub> during hypothermic cardiopulmonary bypass (CPB).

#### Methods:

We studied eight patients undergoing elective cardiac surgery, with the approval of the Clinical Research Practices Committee. All gave informed written consent. Subjects were excluded for chronic hypertension and known cerebrovascular disease. After premedication with lorazepam po and morphine im, we induced narcosis with fentanyl 75 mg.kg<sup>-1</sup>, while pancuronium and/or metocurine produced muscle relaxation. No additional drugs other than O<sub>2</sub> were given until completion of measurements.

During hypothermic nonpulsatile CPB, we determined regional CBF by clearance of <sup>133</sup>Xenon injected via the arterial inflow cannula. Since regional variance was minimal, mean global CBF for each patient was calculated by averaging regional values from 16 cadmium telluride gamma detectors. We utilized the CBF<sub>15</sub> computation technique, corrected for decreases in nasopharyngeal temperature (NPT) and hematocrit (Hct). PaCO<sub>2</sub> was held constant at approximately 40 mm Hg, uncorrected for NPT. Pump flow (Q), Hct, and mean arterial pressure (MAP) were maintained within narrow limits throughout. During stable hypothermia (NPT = 28°C), baseline CBF was measured and then repeated after specific alteration of PaO<sub>2</sub>, achieved by varying the FiO<sub>2</sub> of gas flow to the membrane oxygenator. Because CBF declines spontaneously with time during CPB, we randomized the direction of PaO<sub>2</sub> change. In the other 4 patients, we increased PaO<sub>2</sub> from the first to the second measurement. In 4 patients we decreased PaO<sub>2</sub> from the first to the second measurement. Data from all 8 patients were combined for statistical analysis. Differences in CBF were compared using paired two-tailed t-tests, significant at p<0.05. All values are expressed as mean ± standard deviation (SD).

#### Results:

Controlled variables remained similar during both measurement intervals (Table). The lower PaO<sub>2</sub> in each patient averaged 128±50 mmHg; the higher PaO<sub>2</sub> averaged 291±46 mmHg. This was associated with a 14% change in CBF from 13.9 ± 3.9 to 12.0 ± 3.2 ml.100g<sup>-1</sup>.min<sup>-1</sup> (p<0.02)(Figure).

#### Discussion:

In normal awake persons, hypoxemia (FiO<sub>2</sub> = .1) increases CBF by 35%, while hyperoxia (FiO<sub>2</sub>>.85) decreases CBF by approximately 15%<sup>1,2</sup>. Cerebral oxygen utilization remains unchanged. This study examined the response of CBF to changes in PaO<sub>2</sub> within a range acceptable during clinical CPB. Our results demonstrate that cerebrovascular responsiveness to PaO<sub>2</sub> is preserved during hypothermic nonpulsatile cardiopulmonary bypass.

Table Controlled Variables (mean ± SD)

| PaO <sub>2</sub><br>(mmHg) | NPT<br>(°C) | Q<br>(L/min/m <sup>2</sup> ) | PaCO <sub>2</sub> *<br>(mm Hg) | Hct<br>(vol%) | MAP<br>(mmHg) |
|----------------------------|-------------|------------------------------|--------------------------------|---------------|---------------|
| 128±50                     | 27.2±.7     | 1.95±.5                      | 41±1.4                         | 22±3          | 70±12         |
| 291±46                     | 27.3±.7     | 2.00±.6                      | 40±1.9                         | 22±3          | 72±10         |

\* Uncorrected for body temperature

#### References:

- Lassen NA: Cerebral blood flow and oxygen consumption in man. *Physiol Rev* 39:183-238,1959
- Kety S, Schmidt CF: The effects of altered arterial tensions of carbon dioxide and oxygen on cerebral blood flow and cerebral oxygen consumption of normal young men. *J Clin Invest* 27:484-492,1948

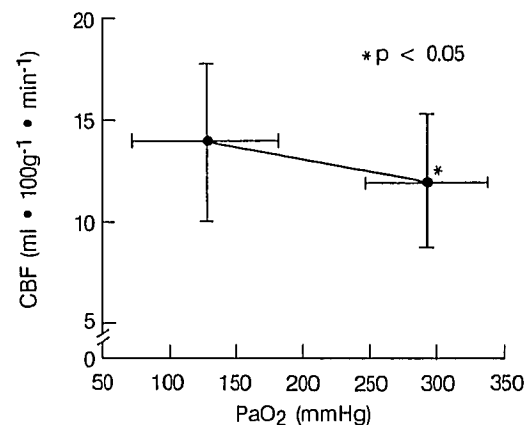

Figure. Correlation of CBF with PaO<sub>2</sub> during CPB
